CORRECTION

# Correction: Geospatial characteristics of measles transmission in China during 2005–2014

Wan Yang, Liang Wen, Shen-Long Li, Kai Chen, Wen-Yi Zhang, Jeffrey Shaman

## Notice of republication

This article was republished on January 16, 2018, to correct information provided in the Data Availability statement. Please download this article again to view the correct version.

## Supporting information

**S1 File. Republished, corrected article.**  
(PDF)

## Reference

1. Yang W, Wen L, Li S-L, Chen K, Zhang W-Y, Shaman J (2017) Geospatial characteristics of measles transmission in China during 2005–2014. *PLoS Comput Biol* 13(4): e1005474. <https://doi.org/10.1371/journal.pcbi.1005474> PMID: 28376097

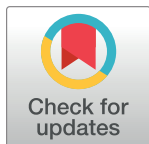

## OPEN ACCESS

**Citation:** Yang W, Wen L, Li S-L, Chen K, Zhang W-Y, Shaman J (2019) Correction: Geospatial characteristics of measles transmission in China during 2005–2014. *PLoS Comput Biol* 15(6): e1007144. <https://doi.org/10.1371/journal.pcbi.1007144>

**Published:** June 14, 2019

**Copyright:** © 2019 Yang et al. This is an open access article distributed under the terms of the [Creative Commons Attribution License](https://creativecommons.org/licenses/by/4.0/), which permits unrestricted use, distribution, and reproduction in any medium, provided the original author and source are credited.
